# Supplementary material for: The interaction of fibrinolysis and the complement system in patients with acute pulmonary embolism, treated with ultrasound-assisted catheter-directed thrombolysis
Source: Research Square preprint supplement (doi:10.21203/rs.3.rs-7180620/v1), 2025-09-15
Supplement: Supplementary file 1 [file 008cca39d774173d2b919603.docx]

Supplemental material to

Draxler DF et al.

« The interaction of fibrinolysis and the complement system in patients with acute pulmonary embolism, treated with ultrasound-assisted thrombolysis »

| **Suppl. Table 1. Procedural characteristics** | |
| --- | --- |
|  | n = 35 |
| Indication (primary) | 35 (100%) |
| Heart rate (min) | 97.4 ± 14.6 |
| Amount of radiation (cGy.cm2) | 2434.6 ± 1947.8 |
| Right heart catheter |  |
| - baseline PAPs (systolic) | 57.9 ± 14.9 |
| - baseline PAPd (diastolic) | 17.4 ± 5.0 |
| - baseline PAPm (mean) | 32.9 ± 7.6 |
| - baseline SvO2 | 60.0 ± 8.0 |
| - baseline RAm | 8.4 ± 4.0 |
| Access site | 35 (100%) |
| - femoral left | 2 (6%) |
| - femoral right | 33 (94%) |
| - other | 0 (0%) |
| Thrombolytic agent used | n = 35, |
| - rtPA | 35 (100%) |
| - other | 0 (0%) |
| Catheter-directed thrombolysis: bolus | 1 (3%) |
| Catheter-directed thrombolysis: bolus (mg/cath) | 5 |
| Duration of EKOS |  |
| - 5 h | 1 (3%) |
| - 10 h | 3 (9%) |
| - 15 h | 31 (89%) |
| Catheter-directed thrombolysis: cumulative dose |  |
| - 10 mg | 3 (9%) |
| - 15 mg | 4 (11%) |
| - 20 mg | 28 (80%) |
| Switch to other treatment | 0 (0%) |
| ECMO inserted | 0 (0%) |

| **Suppl. Table 2. Changes of complement components over time** | | | | | | |
| --- | --- | --- | --- | --- | --- | --- |
| **parameter** | | **n** | | | **Median of differences (95% CI)** | **p-value** |
| **factor I** | **34** | | **-1734.05 (-3664.98, -394.86)** | | | **0.011** |
| **C3a** | **34** | | **-17.83 (-37.2, -2.98)** | | | **0.018** |
| **Ba** | **34** | | **-56.35 (-108.76, -6.72)** | | | **0.031** |
| **factor H** | **34** | | **-18.68 (-27.57, -1.5)** | | | **0.036** |
| C5b-9 | 34 | | 18.35 (-36.91, 69.95) | | | 0.42 |
| C5a | 34 | | 0.15 (-0.52, 0.81) | | | 0.67 |
| C4a | 34 | | 63.76 (-59.46, 116.88) | | | 0.69 |
| Bb | 34 | | | -0.01 (-0.08, 0.07) | | 0.92 |

|  |  |  |  |  |  |  |  |  |
| --- | --- | --- | --- | --- | --- | --- | --- | --- |
|  |  |  |  |  |  |  |  |  |

| **Suppl. Table 3. Markers assessed during lysis (t=6h) predicting post-thrombolysis RV/LV ratio controlling for pre-lysis RV/LV ratio and rt-PA dose** | | |
| --- | --- | --- |
|  |  |  |
| **parameter** | **bootstrap coefficient (95% CI)** | **p-value** |
|  |  |  |
| C5b-9 | -0.00025 [-0.00060 to 0.00010] (n=31) | 0.16 |
| C5a | -0.00688 [-0.02082 to 0.00707] (n=31) | 0.33 |
| C4a | 0.00012 [-0.00013 to 0.00037] (n=31) | 0.35 |
| Bb | 0.14918 [-0.16797 to 0.46633] (n=31) | 0.36 |
| Ba | 0.00019 [-0.00029 to 0.00066] (n=31) | 0.44 |
| factor I | -0.00000 [-0.00001 to 0.00001] (n=31) | 0.60 |
| C3a | 0.00006 [-0.00213 to 0.00225] (n=31) | 0.96 |
| factor H | 0.00002 [-0.00120 to 0.00124] (n=31) | 0.97 |

| **Suppl. Table 4. Complement components assessed before treatment start predicting post-thrombolysis RV/LV ratio controlling for pre-lysis RV/LV ratio and rt-PA dose** | | |
| --- | --- | --- |
|  |  |  |
| **parameter** | **bootstrap coefficient (95% CI)** | **p-value** |
|  |  |  |
| **Ba** | **0.00034 [0.00002 to 0.00066] (n=31)** | **0.039** |
| C3a | 0.00074 [-0.00035 to 0.00184] (n=31) | 0.18 |
| Bb | 0.22705 [-0.13285 to 0.58695] (n=31) | 0.22 |
| factor H | 0.00032 [-0.00066 to 0.00130] (n=31) | 0.52 |
| factor I | 0.00000 [-0.00001 to 0.00002] (n=31) | 0.53 |
| C5a | -0.00436 [-0.01833 to 0.00962] (n=31) | 0.54 |
| C4a | 0.00005 [-0.00020 to 0.00030] (n=31) | 0.69 |
| C5b-9 | -0.00006 [-0.00050 to 0.00037] (n=31) | 0.77 |
